# Supplementary material for: DWnt4 regulates the dorsoventral specificity of retinal projections in the Drosophila melanogaster visual system
Source: Springer Nature journal article supplement (doi:10.1038/nn1604), 2005-12-20
Supplement: nn1604-S5.pdf [file nn1604-S5.pdf]

## Supplementary Figure 5

### Models

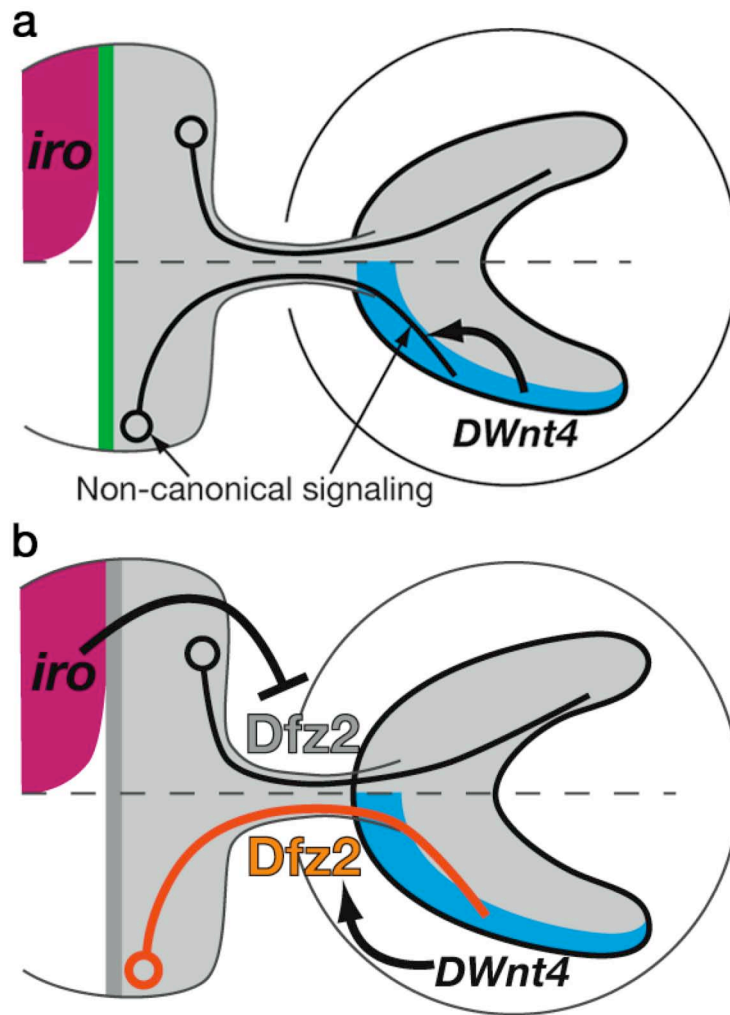

(a) A model for *Drosophila* retinotopic mapping. *DWnt4* and non-canonical Wnt signaling in R cells regulate ventral projection of ventral R axons. (b) A model for roles of *iro* in attenuating the *Dfz2*-dependent Wnt signaling in the dorsal axons that responds to *DWnt4*.
